Piyush M. Patel, M.D., F.R.C.P.C.,\* John C. Drummond, M.D., F.R.C.P.C.,† Daniel J. Cole, M.D.,‡  
Randall L. Goscawicz, M.D.\*

**Methods:** Microdialysis probes were implanted into the parietal cortex and dorsal hippocampus of four groups of anesthetized rats ( $n = 5$  per group). The hypothermic group was anesthetized with 1.2% halothane. The two isoflurane groups were anesthetized with 0.5 minimum alveolar concentration or electroencephalographic burst-suppression doses of isoflurane ( $\approx 2$  minimum alveolar concentration). The control group was anesthetized with 70%  $N_2O$ -30%  $O_2$  and fentanyl. The pericranial temperature was maintained at  $34^\circ C$  in the hypothermic group and at  $38^\circ C$  in the remaining groups. Ischemia was induced by bilateral carotid artery occlusion with simultaneous hypotension to 35 mmHg for 10 min, followed by a reperfusion period of 70 min. Dialysate was collected before, during, and after ischemia. The concentrations of glutamate and glycine in the dialysate were measured by high-performance liquid chromatography.

**Conclusions:** Hypothermia inhibits ischemia-induced excitatory neurotransmitter release in the rat. Isoflurane, in comparison with a N<sub>2</sub>O-fentanyl-anesthetized state, significantly attenuates excitatory neurotransmitter release in the hippocampus. This effect of isoflurane is comparable to that of mild hypothermia. (Key words: Anesthetics, volatile; isoflurane. Animals: rat. Brain, ischemia: forebrain. Neurotransmitters, excitatory: glutamate; glycine. Temperature: hypothermia.)

The current study was conducted to evaluate this possibility. The effect of isoflurane, in 0.5 minimum alveolar concentration (MAC) and electroencephalographic (EEG) burst-suppression doses, on ischemia-

Address reprint requests to Dr. Patel: Anesthesia, VA Medical Center  
125, 3350 La Jolla Village Drive, San Diego, California 92161-5085.

Anesthesiology, V 82, No 4, Apr 1995

induced glutamate release in rats subjected to hypothermia. Hypothermia reduced significantly (p < 0.05) the release of glutamate (Fig. 1) and the release of glutamate was reduced significantly (p < 0.05) in the hypothermic state.

[illegible]

The animal (David Kopf) mm in diameter laterally. Unc was carefully juring the unc with 2-mm me tems, West L ment. The pro and inserted i and 4.6 mm l

## ISOFLURANE AND ISCHEMIA-INDUCED GLUTAMATE RELEASE

induced glutamate and glycine release was assessed in rats subjected to incomplete forebrain ischemia. The effect of isoflurane was compared with that of mild hypothermia (an intervention that has been shown to reduce significantly ischemia-induced glutamate release) and to a N<sub>2</sub>O-fentanyl-anesthetized control state.

### Materials and Methods

The experimental protocol was approved by the institutional Animal Use Subcommittee. Animals were prepared as described previously.<sup>9,10</sup> Fasted male Wistar-Kyoto rats (Harlan Sprague-Dawley, Indianapolis, IN) of the same age and weight (275–350 g) were anesthetized with 3% halothane in O<sub>2</sub>. After orotracheal intubation, mechanical ventilation of the lungs was initiated with a gas mixture of 2% halothane in 30% O<sub>2</sub>-balance N<sub>2</sub>. The end-tidal concentration of the expired gases, sampled at the level of the carina, was measured intermittently with an infrared anesthetic agent analyzer (RGM 5250 Infrared Gas Analyzer, Ohmeda, Englewood, CO). Mechanical ventilation was adjusted to maintain normocapnia (arterial CO<sub>2</sub> tension 35–40 mmHg). Pericranial temperature was measured with a thermistor (Mon-a-Therm temperature sensor, Mallinckrodt Anesthesia Products, St. Louis, MO) that was inserted between the temporalis muscle and the skull. The pericranial temperature was controlled by servomechanism to 38°C with an overhead heat lamp that was directed at the animal's body. The tail artery and the right external jugular vein were cannulated. Via a midline pretracheal incision, both carotid arteries were exposed and were encircled loosely with silk sutures. Platinum needle EEG electrodes (Grass Instruments, Quincy, MA) were inserted into the scalp in a frontooccipital configuration, and the EEG was recorded continuously (Accutrace 200A, Beckman, Fullerton, CA).

The animal's head was secured in a stereotaxic frame (David Kopf Instruments, Tujunga, CA). Burr holes 4 mm in diameter were drilled caudal to the bregma bilaterally. Under a stereoscopic microscope, the dura was carefully incised with a 30-G needle without injuring the underlying cortex. Two microdialysis probes with 2-mm membrane tips (CMA-12, Bioanalytical Systems, West Lafayette, IN) were used in each experiment. The probes were mounted on micromanipulators and inserted into the parietal cortex (2.8 mm caudal and 4.6 mm lateral to the bregma; depth 4.5 mm from

the surface of the skull) and the dorsal hippocampus (2.8 mm caudal and 2.0 mm lateral to the bregma; depth 5.3 mm from the surface of the skull). The coordinates for probe insertion were derived from a stereotaxic atlas of the rat brain.<sup>11</sup> At the conclusion of the surgical preparation, all wounds were infiltrated with 0.25% bupivacaine (approximate dose 0.4–0.5 mg) Sensorcaine, Astra Pharmaceutical Products, Westborough, MA) and the halothane was adjusted to achieve an end-tidal concentration of 1.2%. Pancuronium was administered in 0.2-mg boluses as necessary to maintain muscle relaxation.

After probe insertion, the animals were left undisturbed for 60 min. The animals were then allocated randomly to one of four groups (*n* = 5 rats per group). In the hypothermic group, the pericranial temperature was allowed to decrease spontaneously and it was then servo-controlled at 34°C. In the N<sub>2</sub>O-fentanyl group, N<sub>2</sub> administration was discontinued and the inspired gas mixture was changed to 70% N<sub>2</sub>O-30% O<sub>2</sub>. Simultaneously, a fentanyl infusion was initiated (bolus of 25 µg/kg and infusion rate of 25 µg · kg<sup>-1</sup> · h<sup>-1</sup>) and the administration of halothane was discontinued. In the two isoflurane groups, administration of halothane was discontinued and simultaneously, isoflurane was introduced. In the 0.5 MAC isoflurane group, the end-tidal concentration of isoflurane was maintained at 0.6% (0.5 MAC). In the large-dose isoflurane group, the end-tidal concentration of isoflurane was increased until EEG burst-suppression (4 or 5 bursts/min) was achieved (2.1–2.3% end-tidal). The animals were then left undisturbed for an equilibration period of 70 min. Serum glucose, hematocrit, and mean arterial pressure were recorded during this period. Arterial CO<sub>2</sub> and O<sub>2</sub> tensions and arterial pH were measured with a blood gas analyzer (IL-1306, Instrumentation Laboratories, Lexington, MA).

The animals in all groups were then subjected to 10 min of forebrain ischemia.<sup>12</sup> Heparin, 30 U intravenous, was injected through the right external jugular vein catheter. Hypotension was induced by intravenous injection of 3 mg trimethaphan (Arfonad, Roche Laboratories, Nutley, NJ) followed by adjustment of intravascular volume to achieve a mean arterial pressure of 35 mmHg (approximately 2.5–3.0 ml of blood was withdrawn). Both carotid arteries were then occluded with vascular clamps for 10 min. At the conclusion of the ischemic interval, the vascular clamps were removed and blood pressure was restored by rapid reinfusion of the withdrawn blood. Protamine, 0.3 mg



(QUAD Pharmaceuticals, Indianapolis, IN), and  $\text{NaHCO}_3$ , 0.25 mEq, were administered to reverse the heparinization and metabolic acidosis, respectively. During the reperfusion period, mean arterial pressure was maintained above 70 mmHg by infusion of up to 2.5 ml/kg of normal saline. Seventy minutes after reperfusion was established, 1 ml/kg 3% Evans' blue dye was administered intravenously. The animals were sacrificed 5 min afterward and their brains harvested and sliced coronally. The location of the probes within the cortex and hippocampus was identified macroscopically.

#### Microdialysis

Before the use of the probes, the efficiency of the probe membrane was analyzed by immersing the probes in a 10 mM glucose solution at 38°C.<sup>13</sup> The probes were perfused with Ringer's solution at a rate of 2  $\mu\text{l}/\text{min}$  and the *in vitro* rate of glucose recovery measured. The average recovery of glucose in new probes is approximately 20%. Probes with an *in vitro* recovery rate of less than 15% were discarded. The probes were perfused with Ringer's solution at a rate of 2  $\mu\text{l}/\text{min}$ . The dialysate was collected in two 20-min epochs during the preischemic period, for four 5-min epochs during ischemia and for the first 10 min of reperfusion, and for three 20-min epochs for the remainder of the reperfusion period. The samples were frozen at -20°C for later analysis. The amino acids in the dialysate were derivatized with phenylisothiocyanate. The concentrations of the derived amino acids were measured with high-performance liquid chromatography with a reverse phase column. The derivatives were detected fluorometrically with an ultraviolet detector and the peaks were integrated and quantified by calibration with standards of known concentrations.

#### Statistical Analysis

The physiologic data were analyzed by factorial analysis of variance. Where analysis of variance identified differences, *post hoc* Fisher protected least significant difference tests were used for intergroup comparisons. The amino acid concentrations were log transformed and the transformed data were analyzed by a two factor repeated-measures analysis of variance. To preserve statistical power, only baseline and peak concentrations were compared *post hoc*. A paired two-tailed *t* test was

§ Unpublished observations.

used to compare peak with baseline concentrations (within group) and Fisher protected least significant difference tests were used to compare baseline and peak concentrations (among groups). A  $P < 0.05$  was considered to be statistically significant. All data are presented as means  $\pm$  SEM.

#### Results

A total of 22 animals were studied. The dialysates from 1 animal in the isoflurane burst-suppression group and 1 animal in the  $\text{N}_2\text{O}$ -fentanyl group were discarded because the volume of dialysate recovered was significantly less than the volume of Ringer's solution that was infused. Examination of the probes revealed a membrane leak. These animals were replaced to provide a uniform group size of 5 animals per group. Correct location of the probes in the hippocampus and cortex was confirmed in all animals.

In the hypothermic group, the end-tidal halothane concentration was  $1.2 \pm 0.1\%$ . In the two isoflurane groups, the end-tidal concentration of isoflurane was  $0.6 \pm 0.1\%$  and  $2.1 \pm 0.2\%$ . With the exception of the hypothermic group, halothane was not detected in the exhaled gas that was sampled immediately before the induction of ischemia.

The physiologic data are presented in table 1. The weights of the animals in the four groups were not different. The mean arterial pressure in the  $\text{N}_2\text{O}$ -fentanyl group was slightly greater than in the other groups before ischemia. After ischemia, the mean arterial pressure was similar in all groups. There were no differences in the heart rate. Arterial blood gas tensions and pH were similar among the groups. The hematocrit was slightly less in the hypothermic group than in the other normothermic groups.

#### Glutamate

In the parietal cortex, the preischemic baseline glutamate concentrations were similar in all experimental groups (fig. 1). In the hypothermic group, glutamate concentrations did not increase during ischemia. In contrast, in the  $\text{N}_2\text{O}$ -fentanyl and both isoflurane groups, glutamate concentrations increased during ischemia and returned to baseline after 10 min of reperfusion. The increase was the greatest in the  $\text{N}_2\text{O}$ -fentanyl group and the peak concentration was significantly greater than that observed in the two isoflurane groups. Although the mean glutamate concentration in

Table 1. Physiologic Data

| Number                        | Weight (g) | Preischemic MAP | Postischemic MAP | Preischemic HR | Postischemic HR | $\text{PaO}_2$ | $\text{PaCO}_2$ | pH | Blood glucose (mg/dl) | Hematocrit (%) |
|-------------------------------|------------|-----------------|------------------|----------------|-----------------|----------------|-----------------|----|-----------------------|----------------|
| Values are mean $\pm$ SEM     |            |                 |                  |                |                 |                |                 |    |                       |                |
| EEG B-S = burst suppression   |            |                 |                  |                |                 |                |                 |    |                       |                |
| * $P < 0.05$ vs. normothermic |            |                 |                  |                |                 |                |                 |    |                       |                |
| † $P < 0.05$ hypothermic      |            |                 |                  |                |                 |                |                 |    |                       |                |

the 0.5 MAC isoflurane group, the EEG burst-suppression did not occur.

In the dorsomedial cortex, before ischemia, the isoflurane groups, glutamate concentrations were significantly different from the  $\text{N}_2\text{O}$ -fentanyl group. The concentrations were also significantly different from the isoflurane groups.

#### Glycine

In the parietal cortex, in the baseline, the groups before ischemia were statistically similar and 0.5 MAC isoflurane burst-suppression during ischemia, glycine concentrations in all four groups were statistically significant. The peak glycine concentrations in the groups were significantly different. During reperfusion, they returned to baseline.

## ISOFLURANE AND ISCHEMIA-INDUCED GLUTAMATE RELEASE

Table 1. Physiologic Variables in the Experimental Groups

|                             | Nitrous<br>Oxide-Narcotic | Isoflurane, 0.5 MAC | Isoflurane, EEG B-S | Hypothermia |
|-----------------------------|---------------------------|---------------------|---------------------|-------------|
| Number                      | 5                         | 5                   | 5                   | 5           |
| Weight (g)                  | 295 ± 3                   | 304 ± 5             | 318 ± 13            | 293 ± 19    |
| Preischemic MAP (mmHg)      | 120 ± 5*                  | 107 ± 7             | 92 ± 6              | 87 ± 6      |
| Postischemic MAP (mmHg)     | 99 ± 6                    | 115 ± 7             | 102 ± 9             | 94 ± 10     |
| Preischemic HR (beats/min)  | 394 ± 9                   | 414 ± 23            | 380 ± 16            | 356 ± 22    |
| Postischemic HR (beats/min) | 396 ± 12                  | 444 ± 33            | 360 ± 11            | 308 ± 10    |
| PaO <sub>2</sub>            | 169 ± 11                  | 166 ± 18            | 200 ± 11            | 183 ± 26    |
| PaCO <sub>2</sub>           | 36.8 ± 0.3                | 36.3 ± 1.9          | 37.8 ± 1.0          | 38.7 ± 1.5  |
| pH                          | 7.38 ± 0.02               | 7.44 ± 0.02         | 7.41 ± 0.02         | 7.38 ± 0.02 |
| Blood glucose (mmol/dl)     | 4.6 ± 0.3                 | 4.7 ± 0.1           | 4.7 ± 0.1           | 4.4 ± 0.2   |
| Hematocrit (%)              | 44 ± 1                    | 45 ± 1              | 46 ± 1              | 42 ± 1†     |

Values are mean ± SEM.

EEG B-S = electroencephalogram burst-suppression; MAP = mean arterial pressure; HR = heart rate.

\*  $P < 0.05$ , nitrous oxide-fentanyl group versus 0.5 MAC isoflurane and hypothermic groups.

†  $P < 0.05$ , hypothermic group versus the two isoflurane groups.

the 0.5 MAC isoflurane group was greater than that in the EEG burst-suppression isoflurane group, the difference did not attain statistical significance.

In the dorsal hippocampus, glutamate concentrations before ischemia were similar in all groups (fig. 1). In the isoflurane EEG burst-suppression and hypothermia groups, glutamate concentrations did not increase during ischemia. In the N<sub>2</sub>O-fentanyl and 0.5 MAC isoflurane groups, glutamate concentrations increased significantly during ischemia. The glutamate concentrations returned to baseline after 10–30 min of reperfusion. Glutamate concentrations were greater in the N<sub>2</sub>O-fentanyl group than in the other three groups. The concentrations in the 0.5 MAC isoflurane group were also greater than in the EEG burst-suppression isoflurane group and in the hypothermic group.

#### Glycine

In the parietal cortex, there were small differences in the baseline glycine concentrations among the groups before ischemia (fig. 2). Glycine concentrations were statistically slightly greater in the N<sub>2</sub>O-fentanyl and 0.5 MAC isoflurane groups than in the EEG burst-suppression isoflurane and hypothermic groups. During ischemia, glycine concentrations appeared to increase in all four groups. However, the increase reached statistical significance in only the N<sub>2</sub>O-fentanyl group. The peak glycine concentrations in the N<sub>2</sub>O-fentanyl group were significantly greater than in the other three groups. During reperfusion, glycine concentrations returned to baseline values.

In the dorsal hippocampus, glycine concentrations immediately before ischemia were similar in all groups (fig. 2). During ischemia, there were no changes in glycine concentrations in the hypothermia and isoflurane EEG burst-suppression groups. By contrast, glycine concentrations increased significantly from preischemic baseline values during ischemia in the N<sub>2</sub>O-fentanyl and 0.5 MAC isoflurane groups. Glycine concentrations returned to preischemic baseline values during reperfusion. Because of a wide interanimal variability in glycine concentrations in this structure, the peak concentrations in the N<sub>2</sub>O-fentanyl and in the 0.5 MAC isoflurane groups were not different from the hypothermic and EEG burst-suppression isoflurane groups.

#### Discussion

The results of the current investigation demonstrate that the anesthetic state influences ischemia-induced release of the neurotransmitters glutamate and glycine. Specifically, isoflurane, in comparison with N<sub>2</sub>O-fentanyl, reduced concentrations of glutamate in the dialysates from the parietal cortex and from the dorsal hippocampus during ischemia. Furthermore, isoflurane reduced ischemia-induced glycine release in a manner that was qualitatively similar to that of glutamate release in both structures. In fact, the ability of isoflurane to suppress excitatory neurotransmitter release in this model of incomplete forebrain ischemia was compa-

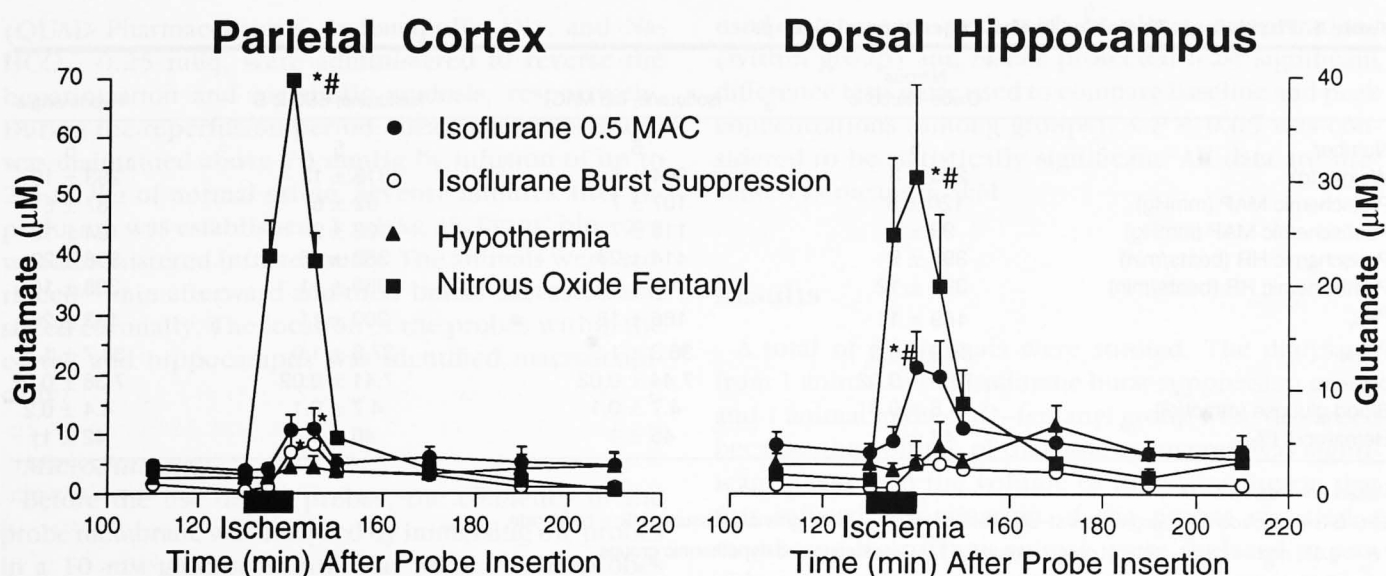

Fig. 1. Glutamate concentrations in the dialysate from the parietal cortex (left) and the dorsal hippocampus (right) in the four experimental groups. Incomplete forebrain ischemia (solid bar on the abscissa) was induced 130 min after the insertion of the probes. \* $P < 0.05$ , preischemic versus peak intras ischemic concentrations within groups; # $P < 0.05$ ,  $N_2O$ -fentanyl group versus the other three groups (parietal cortex) and  $N_2O$ -fentanyl and isoflurane 0.5 minimum alveolar concentration group versus the hypothermic and isoflurane electroencephalographic burst-suppression groups (dorsal hippocampus). Data are means  $\pm$  SEM.

able to that of mild hypothermia, an intervention that has been shown previously to reduce ischemia-induced release of glutamate.<sup>5,14</sup>

Currently, the mechanism by which isoflurane reduces ischemia-induced glutamate release is not clear.

The glutamate that is released during ischemia is derived from two potential sources: vesicular and non-vesicular cytoplasmic stores. Upon ischemia-induced depolarization, influx of  $Ca^{2+}$  into the presynaptic terminal normally leads to the exocytosis of vesicular glu-

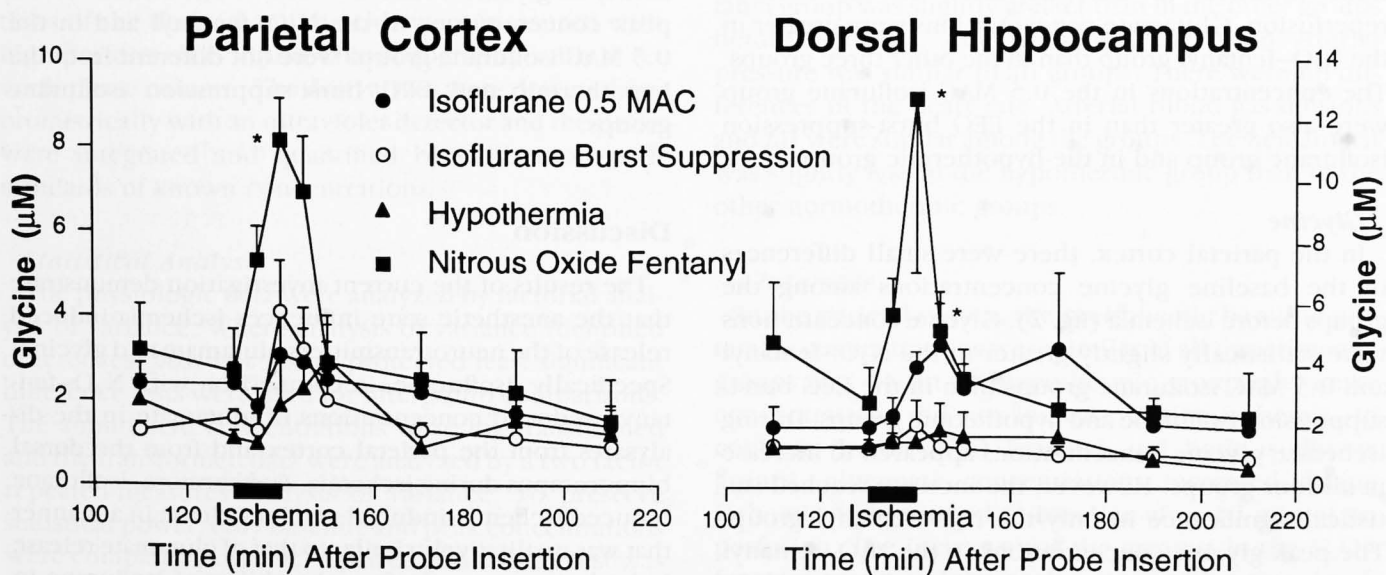

Fig. 2. Glycine concentrations in the dialysate from the parietal cortex (left) and the dorsal hippocampus (right) in the four experimental groups. Incomplete forebrain ischemia (solid bar on the abscissa) was induced 130 min after the insertion of the probes. \* $P < 0.05$ , preischemic versus peak intras ischemic concentrations within groups. Data are means  $\pm$  SEM.

tamate.<sup>15</sup> This glutamate is an excitatory neurotransmitter. Once adenosine is released, it is subsequently, this little of the glutamate. Depletion of glutamate to the collapse of neuronal cell. the glutamate efflux in the dialysate is able that isoflurane by inhibiting independent release of glutamate on glutamate specifically, is stimulated release of glutamate preparations.<sup>16</sup> has been attributed to an increase in  $Ca^{2+}$  influx into the terminal to reduce  $Ca^{2+}$  influx contributed to the release of glutamate was observed.

A second potential mechanism for the inhibition of the release of glutamate from the cytoplasmic stores is the inhibition of the glutamate transporter. Anai *et al.* have shown that isoflurane interferes with the glutamate transporter (aspartate is a cotransporter).<sup>24</sup> If the transporter is inhibited, the release of glutamate from the terminal is increased. Isoflurane does not inhibit the release of glutamate from the vesicular stores. Isoflurane may inhibit the release of glutamate from the cytoplasmic stores by anoxic depolarization, which results from the release of glutamate and adenosine. This has been shown in rats with ischemia.<sup>24</sup> This mechanism is supported by the experimental data. The anesthetic agent isoflurane does not release with identical results.

The observation that isoflurane reduces glutamate release in the complete forebrain



## ISOFLURANE AND ISCHEMIA-INDUCED GLUTAMATE RELEASE

tamate.<sup>15</sup> This  $\text{Ca}^{2+}$ -dependent release of vesicular glutamate is an energy requiring process and is inhibited once adenosine triphosphate is depleted.<sup>16</sup> Consequently, this mechanism is probably responsible for little of the glutamate release that occurs during ischemia. Depletion of adenosine triphosphate also leads to the collapse of the normal  $\text{Na}^+$  gradient across the neuronal cell membrane. The subsequent reversal of the glutamate transporter<sup>17</sup> can lead to further glutamate efflux into the extracellular space. It is conceivable that isoflurane may have reduced glutamate release by inhibiting both the  $\text{Ca}^{2+}$ -dependent and  $\text{Ca}^{2+}$ -independent release processes. Although the effect of isoflurane on glutamate release has not been evaluated specifically, isoflurane has been shown to reduce the stimulated release of neurotransmitters in *in vitro* preparations.<sup>18,19</sup> The reduction of transmitter release has been attributed to an anesthetic mediated reduction in  $\text{Ca}^{2+}$  influx into the cells.<sup>18,19</sup> The ability of isoflurane to reduce  $\text{Ca}^{2+}$ -dependent transmitter release may have contributed to the reduction in glutamate release that was observed in the current investigation.

A second possibility is that isoflurane may have inhibited the release of glutamate from nonvesicular cytoplasmic sources by affecting the glutamate transporter. Arai *et al.* have shown that halothane does not interfere with the release or uptake of labeled aspartate (aspartate is also transported by the glutamate transporter).<sup>20</sup> If these results are also applicable to isoflurane, then the results of Arai *et al.*<sup>20</sup> suggest that isoflurane does not interfere with the function of the glutamate transporter *per se*. However, it is possible that isoflurane may have delayed  $\text{Ca}^{2+}$ -independent release of glutamate by delaying the onset of ischemia-induced anoxic depolarization. The glutamate release in large part results from reversal of the glutamate transporter, which occurs with the onset of anoxic depolarization and adenosine triphosphate depletion.<sup>21-23</sup> Isoflurane has been shown to delay the onset of anoxic depolarization in rats subjected to incomplete forebrain ischemia.<sup>24</sup> This may explain the lower glutamate concentrations in the two isoflurane groups. However, data in support of this supposition are lacking, and further experimental clarification, particularly of the effect of anesthetic agents on ischemia-induced glutamate release with identical intervals of anoxic depolarization, is needed.

The observation that isoflurane reduced ischemia-induced glutamate release in a model of severe incomplete forebrain ischemia suggests that isoflurane might

also reduce ischemic neuronal injury. In models of forebrain ischemia, isoflurane does not reduce injury in comparison with a  $\text{N}_2\text{O}$ -anesthetized<sup>25</sup> or halothane-anesthetized<sup>26</sup> states. Such a lack of correlation between dialysate glutamate concentrations and neuronal outcome after ischemia has been reported before. Lekieffre and colleagues have reported that, in rats subjected to forebrain ischemia, kynurenic acid inhibited ischemia-induced glutamate release in the hippocampus but that it did not reduce injury.<sup>27</sup> The results of that study and of the current study question the relevance of ischemia-induced glutamate release to neuronal injury. The data supporting the pivotal role of excessive glutamate release during ischemia in neuronal death are particularly strong (reviewed recently by Diemer *et al.*<sup>28</sup>) and cannot be refuted easily. However, the efficacy of AMPA ( $\alpha$ -amino-3-hydroxy-5-methyl-4-isoxazole) antagonists<sup>29,30</sup> and mild hypothermia<sup>31</sup> in reducing ischemic neuronal injury even when applied in the postischemic phase (when extracellular glutamate concentrations have returned to baseline) suggests that processes other than intranscemic glutamate release are also important to postischemic neuronal outcome. A speculative explanation for the results of the current study (apparent dissociation between glutamate release, as assessed by microdialysis, and neuronal outcome) is that isoflurane, even when it reduces intras ischemic glutamate release, does not modulate pathophysiologic processes in the postischemic phase to appreciably reduce neuronal injury. If so, then the data do suggest that inhibition of glutamate release *in isolation* may not be sufficient to reduce injury in the setting of forebrain ischemia.

Not all the data regarding the influence of volatile anesthetics on ischemia-induced glutamate release are consistent. Although our results are in keeping with those of Koorn *et al.*, who reported recently that isoflurane substantially reduced ischemia-induced dopamine release in the striatum of rats subjected to forebrain ischemia,<sup>32</sup> they differ from those of Illievich *et al.*<sup>13</sup> These investigators observed that, in a rabbit model of global ischemia, isoflurane in EEG burst-suppression doses did not reduce ischemia-induced glutamate release in the hippocampus when compared with a 1 MAC halothane anesthetized state.<sup>13</sup> In fact, in both the halothane- and the isoflurane-anesthetized rabbits, a three- to fourfold increase in glutamate concentrations was evident, whereas in hypothermic rabbits, glutamate release was attenuated substantially. The reason for these

US

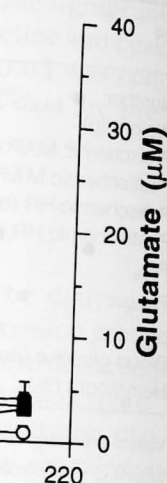

ight) in the four  
insertion of the  
yl group versus  
on group versus  
ta are means  $\pm$

chemia is de-  
lar and non-  
emia-induced  
esynaptic ter-  
vesicular glu-

S

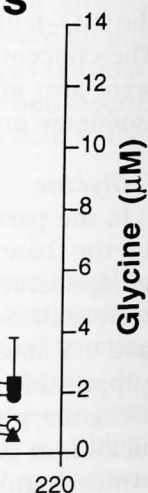

bt) in the four  
insertion of the

apparently discrepant results is not clear. They may be related to interspecies differences (rat *vs.* rabbit) or perhaps to the severity of ischemia (forebrain *vs.* global ischemia). Although the results of the study of Illievich *et al.*<sup>13</sup> and those of the current investigation do not completely define the relative effect of volatile anesthetics and mild hypothermia on ischemia-induced glutamate release, our data do demonstrate unequivocally that isoflurane reduces glutamate release in comparison with N<sub>2</sub>O-fentanyl control (15-fold increase occurred in this group).

Control group animals received fentanyl and the possibility that glutamate concentrations were influenced by this narcotic should be considered. The opioid receptor antagonist nalmefene has been shown to reduce ischemia-induced glutamate and glycine release in the hippocampus of rats subjected to global ischemia.<sup>33</sup> However, the ischemia-induced glutamate release inhibiting effect of nalmefene has been attributed primarily to its ability to antagonize  $\kappa$  opioid receptors and not  $\mu$  receptors.<sup>33</sup> Fentanyl is a  $\mu$  receptor agonist with insignificant activity at  $\kappa$  receptors<sup>34</sup> and therefore, would not be expected to modulate ischemia-induced glutamate release. Given these data, it seems unlikely that fentanyl influenced the glutamate concentrations in the dialysate to any great degree.

In summary, in a rat model of severe incomplete forebrain ischemia, isoflurane reduced ischemia-induced glutamate and glycine release in a dose-dependent manner. In the hippocampus, this reduction in neurotransmitter release was similar in magnitude to that associated with mild hypothermia. The data suggest that reduced ischemia-induced excitatory neurotransmitter release may contribute to the protective effects attributed to isoflurane in some experimental situations. However, because a protective effect of isoflurane has been difficult to demonstrate in many experimental situations<sup>25,35-37</sup> and because hypothermia appears to provide greater degrees of protection than volatile agents,<sup>26</sup> our data suggest that the reduction of excitatory neurotransmitter release may be a necessary but not sufficient condition for achieving cerebral protection. In fact, an evaluation of the effect of isoflurane on ischemia-induced glutamate release and on histopathologic injury in models of focal ischemia is necessary before it can be determined whether a relation between its effect on glutamate release and on neuronal outcome exists.

## References

1. Benveniste H, Drejer J, Schousboe A, Diemer NH: Elevation of the extracellular concentrations of glutamate and aspartate in rat hippocampus during transient cerebral ischemia monitored by intracerebral microdialysis. *J Neurochem* 43:1369-1374, 1984
2. Drejer J, Benveniste H, Diemer NH, Schousboe A: Cellular origin of ischemia-induced glutamate release from brain tissue in vivo and in vitro. *J Neurochem* 45:145-151, 1985
3. Olney JW, Price MT, Samson L, Labruyere J: The role of specific ions in glutamate neurotoxicity. *Neurosci Lett* 65:65-71, 1986
4. Choi DW: Calcium-mediated neurotoxicity: Relationship to specific channel types and role in ischemic damage. *Trends Neurosci* 11:465-469, 1988
5. Baker AJ, Zornow MH, Grafe MR, Scheller MS, Skilling SR, Smul-lin DH, Larson AA: Hypothermia prevents ischemia-induced increases in hippocampal glycine concentrations in rabbits. *Stroke* 22:666-673, 1991
6. vonLubitz DK, Lin RC, McKenzie RJ, Devlin TM, McCabe RT, Skolnick P: A novel treatment of global cerebral ischaemia with a glycine partial agonist. *Eur J Pharmacol* 219:153-158, 1992
7. Richards CD, Smaje JC: Anaesthetics depress the sensitivity of cortical neurones to L-glutamate. *Br J Pharmacol* 58:347-357, 1976
8. Richards CD: Actions of general anaesthetics on synaptic transmission in the CNS. *Br J Anaesth* 55:201-207, 1983
9. Patel PM, Drummond JC, Mitchell MD, Yaksh TL, Cole DJ: Eicosanoid production in the caudate nucleus and dorsal hippocampus after forebrain ischemia: A microdialysis study. *J Cereb Blood Flow Metab* 12:88-95, 1992
10. Patel PM, Drummond JC, Sano T, Cole DJ, Kalkman CJ, Yaksh TL: Effect of ibuprofen on regional eicosanoid production and neuronal injury after forebrain ischemia in rats. *Brain Res* 614:315-324, 1993
11. Pellegrino LJ, Pellegrino AS, Cushman AJ: A Stereotaxic Atlas of the Rat Brain. New York, Plenum Press, 1981
12. Smith ML, Bendek G, Dahlgren N, Rosen I, Wieloch T, Siesjo BK: Models for studying long-term recovery following forebrain ischemia in the rat: A 2-vessel occlusion model. *Acta Neurol Scand* 69:385-401, 1984
13. Illievich UM, Zornow MH, Choi KT, Strnat MAP, Scheller MS: Effects of hypothermia or anesthetics on hippocampal glutamate and glycine concentrations after repeated transient global cerebral ischemia. *ANESTHESIOLOGY* 80:177-186, 1994
14. Busto R, Globus MYT, Dietrich WD, Martinez E, Valdes I, Ginsberg MD: Effect of mild hypothermia on ischemia-induced release of neurotransmitters and free fatty acids in rat brain. *Stroke* 20:904-910, 1989
15. Smith SJ, Augustine GJ: Calcium ions, active zones and synaptic transmitter release. *Trends Neurosci* 11:458-464, 1988
16. Kauppinen RA, McMahon HT, Nicholls DG: Ca<sup>2+</sup>-dependent and Ca<sup>2+</sup>-independent glutamate release, energy status and cytosolic free Ca<sup>2+</sup> concentration in isolated nerve terminals following metabolic inhibition: Possible relevance to hypoglycemia and anoxia. *Neuroscience* 27:175-182, 1988
17. Szatkowski M, Barbour B, Atwell D: Non-vesicular release of glutamate from glial cells by reversed electrogenic glutamate uptake. *Nature* 348:443-446, 1990
18. Mantz J, Varlet C, Lecharny JP, Henzel D, Lenot P, Desmonts JM: Effects of volatile anesthetics, thiopental, and ketamine on spontaneous and depolarization-evoked dopamine release from striatal synaptosomes in the rat. *ANESTHESIOLOGY* 80:352-363, 1994
19. Pocock G: on stimulus-secretion coupling. *Br J Pharmacol* 9:1-10, 1976
20. Arai T, Hayashi T: [3H]-D-aspartate release from rat hippocampal slices. *Neurosci Lett* 267-270, 1990
21. Nicholls DG: Independent release of neurotransmitters from nerve terminals. *Neurosci Lett* 1987
22. Sanchez-Gonzalez A, Nicholls DG: Independent release of neurotransmitters from nerve terminals. *Neurosci Lett* 1988
23. Rubio I, Tóth Z, Nicholls DG: Independent release of neurotransmitters from nerve terminals. *Neurosci Lett* 1988
24. Verhaeghen J, Nicholls DG: Ischemic flow through the anesthetic in rats. *Neurosci Lett* 1988
25. Warner DS, Nicholls DG: on neuronal necrosis in the rat. *ANESTHESIOLOGY* 7:1-10, 1988
26. Sano T, Dr. J. A comparison of mild hypothermia and isoflurane. *ANESTHESIOLOGY* 7:1-10, 1988
27. Lekkert J, RG: Inhibition of acid does not protect against hippocampal injury. *ANESTHESIOLOGY* 7:1-10, 1988
28. Diemer NH, Sano T, Dr. J. A comparison of mild hypothermia and isoflurane. *ANESTHESIOLOGY* 7:1-10, 1988

## ISOFLURANE AND ISCHEMIA-INDUCED GLUTAMATE RELEASE

19. Pocock G, Richards CD: The action of volatile anaesthetics on stimulus-secretion coupling in bovine adrenal chromaffin cells. *Br J Pharmacol* 95:209-217, 1988
20. Arai T, Hatano Y, Mori K: Effects of halothane on the efflux of [ $^3$ H]-D-aspartate from rat brain slices. *Acta Anaesthesiol Scand* 34: 267-270, 1990
21. Nicholls DG, Sihra TS, Sanchez-Prieto J: Calcium-dependent and independent release of glutamate from synaptosomes monitored by continuous fluorometry. *J Neurochem* 49:50-57, 1987
22. Sanchez-Prieto J, Gonzalez P: Occurrence of a large  $Ca^{2+}$ -independent release of glutamate during anoxia in isolated nerve terminals (synaptosomes). *J Neurochem* 50:1322-1324, 1988
23. Rubio I, Torres M, Miras-Portugal MT, Sanchez-Prieto J:  $Ca^{2+}$ -independent release of glutamate during in vitro anoxia in isolated nerve terminals. *J Neurochem* 57:1159-1164, 1991
24. Verhaegen MJ, Todd MM, Warner DS: A comparison of cerebral ischemic flow thresholds during halothane/ $N_2O$  and isoflurane/ $N_2O$  anesthesia in rats. *ANESTHESIOLOGY* 76:743-754, 1992
25. Warner DS, Deshpande JK, Wieloch T: The effect of isoflurane on neuronal necrosis following near-complete forebrain ischemia in the rat. *ANESTHESIOLOGY* 64:19-23, 1986
26. Sano T, Drummond JC, Patel PM, Grafe MR, Watson JC, Cole DJ: A comparison of the cerebral protective effects of isoflurane and mild hypothermia in a rat model of incomplete forebrain ischemia. *ANESTHESIOLOGY* 76:221-228, 1992
27. Lekieffre D, Ghribi O, Callebort J, Allix M, Plotkine M, Boulu RG: Inhibition of glutamate release in rat hippocampus by kynurenic acid does not protect CA1 cells from forebrain ischemia. *Brain Res* 592:333-337, 1992
28. Diemer NH, Johansen FF, Benveniste H, Bruhn T, Berg M, Valente E, Jorgensen MB: Ischemia as an excitotoxic lesion: Protection against hippocampal nerve cell loss by denervation. *Acta Neurochir Suppl (Wien)* 57:94-101, 1993
29. Nøllgard B, Wieloch T: Posts ischemic blockade of AMPA but not NMDA receptors mitigates neuronal damage in the rat brain following transient severe cerebral ischemia. *J Cereb Blood Flow Metab* 12:2-11, 1992
30. Li H, Buchan AM: Treatment with an AMPA antagonist 12 hours following severe normothermic forebrain ischemia prevents CA1 neuronal injury. *J Cereb Blood Flow Metab* 13:933-939, 1993
31. Coimbra C, Wieloch T: Moderate hypothermia mitigates neuronal damage in the rat brain when initiated several hours following transient cerebral ischemia. *Acta Neuropathol (Berl)* 87:325-331, 1994
32. Koorn R, Kahn RA, Brannan TS, Martinez-Tica J, Weinberger J, Reich DL: Effect of isoflurane and halothane on *in vivo* ischemia-induced dopamine release in the corpus striatum of the rat. *ANESTHESIOLOGY* 79:827-835, 1993
33. Graham SH, Shimizu H, Newman A, Weinstein P, Faden AI: Opioid receptor antagonist nalmefene stereospecifically inhibits glutamate release during global cerebral ischemia. *Brain Res* 632: 346-350, 1993
34. Chen JC, Smith ER, Cahill M, Cohen R, Fishman JB: The opioid receptor binding of dezocine, morphine, fentanyl, butorphanol and nalbuphine. *Life Sci* 52:389-396, 1992
35. Nehls DG, Todd MM, Spetzler RF, Drummond JC, Thompson RA, Johnson PC: A comparison of the cerebral protective effects of isoflurane and barbiturates during temporary focal ischemia in primates. *ANESTHESIOLOGY* 66:453-464, 1987
36. Gelb AW, Boisvert DP, Tang C, Lam AM, Marchak BE, Dowman R, Mielke BW: Primate brain tolerance to temporary focal cerebral ischemia during isoflurane or sodium nitroprusside induced hypotension. *ANESTHESIOLOGY* 70:678-683, 1989
37. Ruta TS, Drummond JC, Cole DJ: A comparison of the area of histochemical dysfunction after focal cerebral ischemia during anaesthesia with isoflurane and halothane in the rat. *Can J Anaesth* 38: 129-135, 1991
